WINTER 2015 | VOLUME 27 | NUMBER 1

The Journal of  
**Neuropsychiatry**  
and Clinical Neurosciences

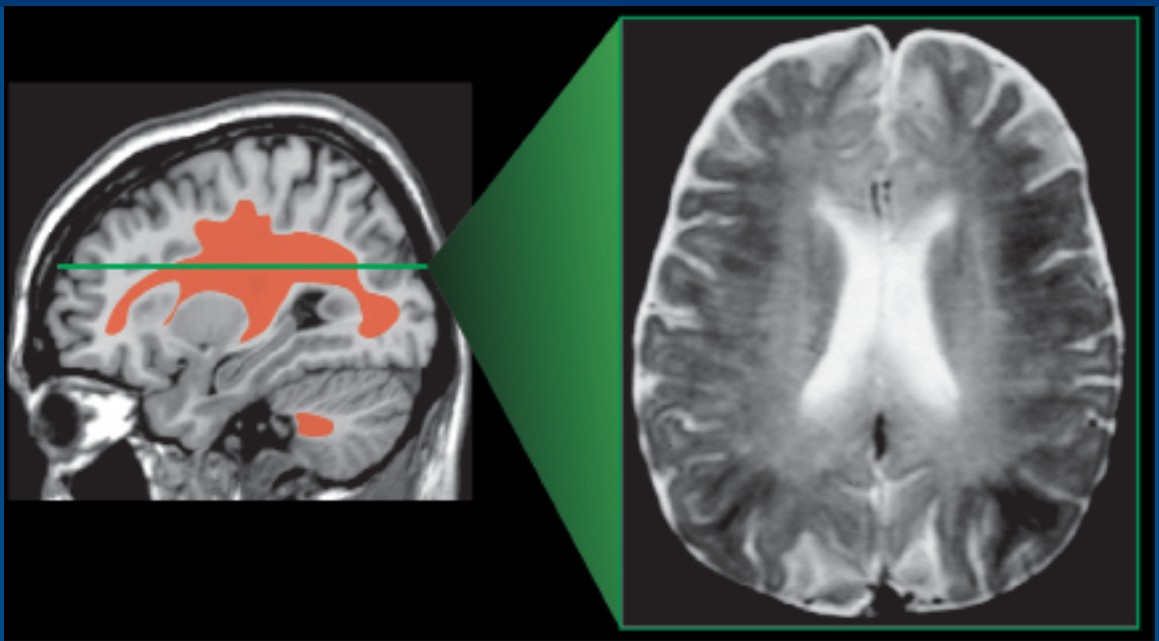

Windows to the Brain: Occupational Exposure to Solvents:  
Neuropsychiatric and Imaging Features

The Neuropsychiatric Spectrum of Motivational Disorders

The Psychiatric and Neuropsychiatric Symptoms After Subthalamic  
Stimulation for Parkinson's Disease

Regional Homogeneity of Resting-State Brain Abnormalities in Violent  
Juvenile Offenders: A Biomarker of Brain Immaturity?

Cannabis Abuse Effects on Prepulse Inhibition in Patients With  
First Episode Psychosis in Schizophrenia

Official Journal of the American Neuropsychiatric Association  
[neuro.psychiatryonline.org](http://neuro.psychiatryonline.org)
