26<sup>th</sup> Annual Meeting

# American Neuropsychiatric Association

March 25-28, 2015

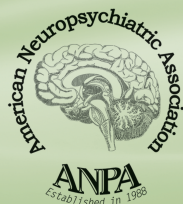

March 25-28, 2015

Walt Disney World Swan and Dolphin

## LAKE BUENA VISTA, FLORIDA

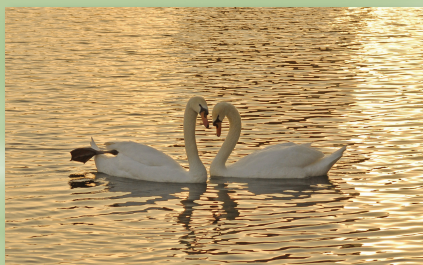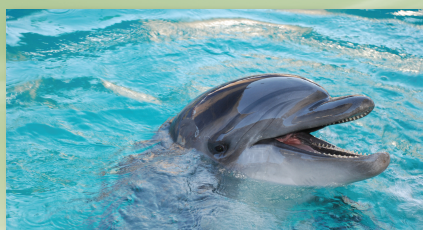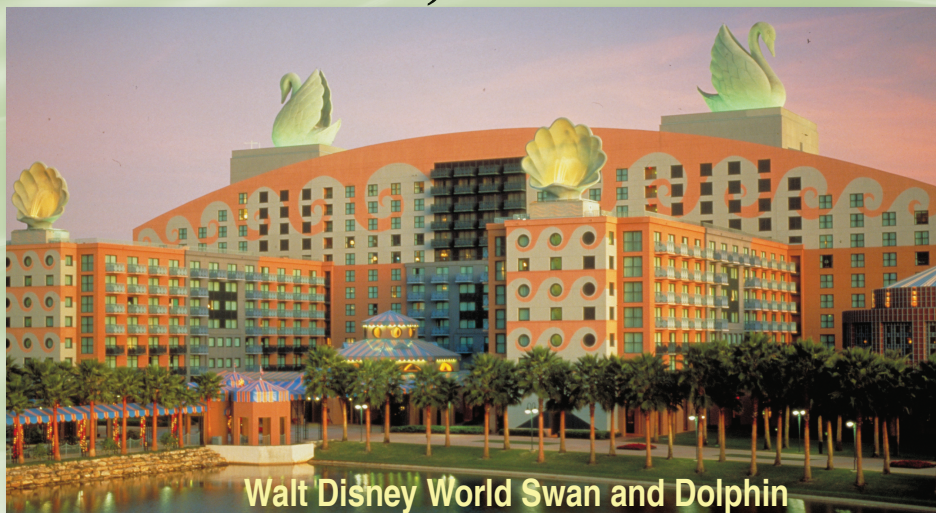

Walt Disney World Swan and Dolphin

*Meeting Theme: NEUROPSYCHIATRY UPDATE*

▶ Earn up to 29 CME/CE Credits, 16 MOC credits

▶ Register by March 16, 2015 and Save! [www.anpaonline.org/event-registration](http://www.anpaonline.org/event-registration)

A block of rooms has been reserved at The Walt Disney World Swan Hotel. Discounted rates of \$225.00 per night have been arranged for ANPA Annual Meeting attendees. A limited number of student rooms are reserved at a rate of \$169.00.

For reservations by telephone please call 1.800.227.1500 and provide reservation code ANA15 (for regular attendees) or code ANA15S (for student and trainee attendees).

For online reservations follow the links on the ANPA page:  
[www.anpaonline.org/venue-information-](http://www.anpaonline.org/venue-information-)

▶ The deadline to reserve is March 1, 2015.

### Featuring:

KEYNOTE SPEAKER –  
Rodolfo Llinas, MD, PhD

LUNCHEON LECTURER –  
Howard I. Kushner, PhD

SESSION CHAIRS –  
Jean E. Cibula, MD  
Bradford C. Dickerson, MD  
Kenneth Heilman, MD  
Daniel I. Kaufer, MD  
Aron H. Lichtman, PhD  
Allan L. Reiss, MD

### Sessions Include:

- Rehabilitation of Neurobehavioral Disorders Associated with Temporal-Parietal-Occipital (TPO) Injury
- Atypical Alzheimer's Disease: Clinical, Pathological, and Treatment Issues
- Cannabis and the Endocannabinoid System
- Tickling the Brain's Funny Bone: The Neuroscience of Humor
- CNS Neuromodulation: The Ins and Outs of Emerging Currents
- Review of the Neuropsychiatric Aspects of Seizure Disorders

Download the full program, including, the meeting agenda, list of invited speakers and more information:

[www.anpaonline.org/meeting-program](http://www.anpaonline.org/meeting-program)

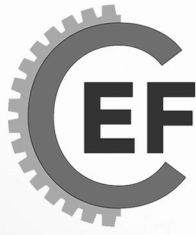

# Comprehensive Executive Function Inventory

Jack A. Naglieri, Ph.D. & Sam Goldstein, Ph.D.

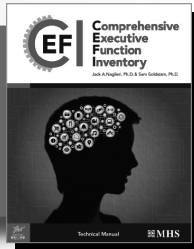

## Executive Function Scores You Can Trust!

**The most representative nationally normed behavior rating scale of executive function.**

The CEFI™ provides a comprehensive evaluation of executive function strengths and weaknesses in youth aged 5 to 18 years.

- **Accurate Results:** Normative samples are within 1% of U.S. Census targets for an accurate representation of the U.S. population.
- **Easy to Understand Reports:** Generate three types of dynamic reports including a Comparative Report by comparing results from multiple rater forms (Parent, Teacher, and Self).
- **Strategies for Intervention:** Utilize the CEFI's nine scales to pinpoint targets for intervention.
- **Save Time:** Assess, score, and report from anywhere with the safe and secure MHS Online Assessment Center.

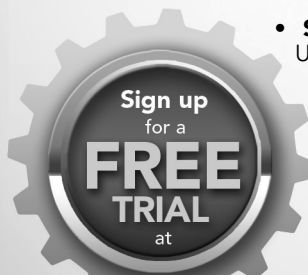

[MHS.com/CEFI](http://MHS.com/CEFI)

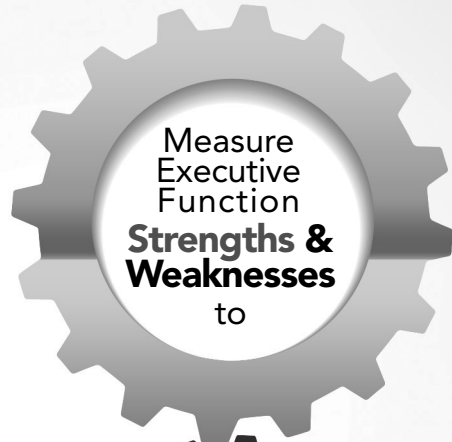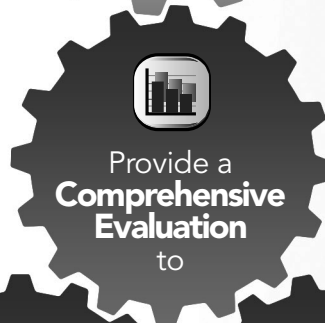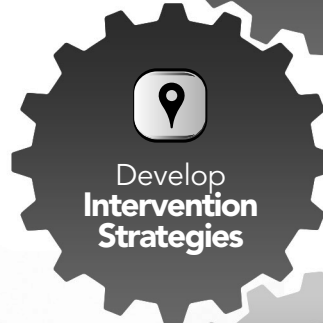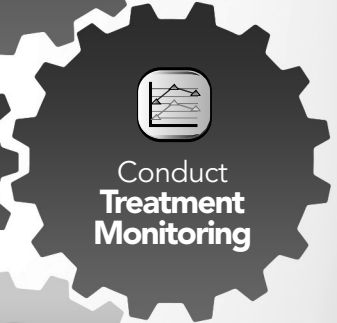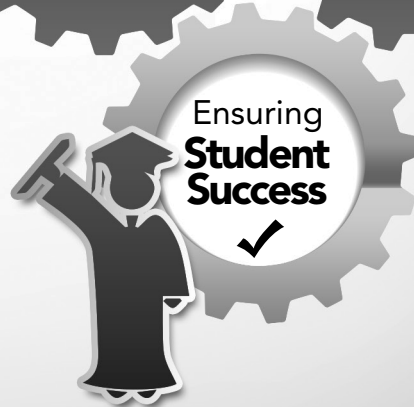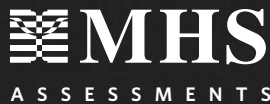

**Multi-Health Systems Inc.**

USA Tel: 1.800.456.3003 / CAN Tel: 1.800.268.6011  
mhs.com • customerservice@mhs.com

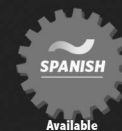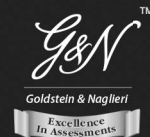

Source: https://psychiatryonline.org/doi/suppl/10.1176/jnp.2015.27.issue-1/suppl_file/back.pdf
