# New Look and Features for *The Journal of Neuropsychiatry and Clinical Neurosciences*!

We have enhanced *The Journal of Neuropsychiatry and Clinical Neurosciences* with a bold new look and engaging features!

## The Journal of Neuropsychiatry and Clinical Neurosciences

Designed with the reader in mind, each issue will now have a more informative Table of Contents that provides a quick takeaway for each article to help you quickly determine items to turn to or mark for later reading.

In addition, symbols on the Table of Contents page and on the articles themselves will help you navigate to content that addresses the Core Competencies as defined by the Accreditation Council of Graduate Medical Education (ACGME) and the American Board of Medical Specialties (ABMS).

But one thing that won't change is that each issue will commence with the outstanding signature section "Windows to the Brain."

This improved reader experience continues at the journal's online portal. The journal homepage will push front and center the latest articles as soon as they are published so that cutting-edge research articles being featured in media stories are immediately discoverable.

We are excited to be bringing these enhancements to you as part of our continuing efforts to ensure we offer the most indispensable journal for professionals working at the interface between neuroscience and behavioral disorders.

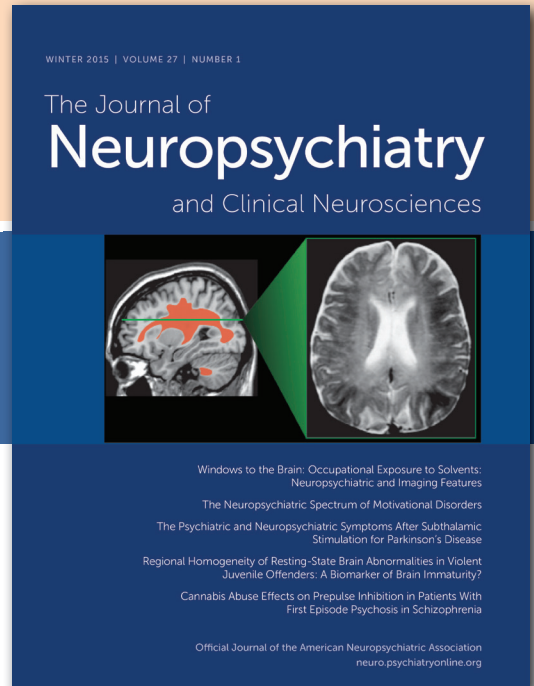

### Core Competencies

-  Professionalism
-  Patient Care and Procedural Skills
-  Medical Knowledge
-  Practice-based Learning and Improvement
-  Interpersonal and Communication Skills
-  Systems-based Practice

[neuro.psychiatryonline.org](http://neuro.psychiatryonline.org)

American  
**Psychiatric**  
Publishing  
A Division of American Psychiatric Association

Web: [www.appi.org](http://www.appi.org)  
Phone: 1-800-368-5777  
Email: [appi@psych.org](mailto:appi@psych.org)

Priority Code AH1502

# The Journal of Neuropsychiatry and Clinical Neurosciences

Official Journal of the American Neuropsychiatric Association

## Editorial Board

The *Journal of Neuropsychiatry and Clinical Neurosciences* (ISSN 0895-0172), is published quarterly by the American Psychiatric Association (APA), 1000 Wilson Blvd., Suite 1825, Arlington, VA 22209. Copyright © 2015 American Psychiatric Association. The *Journal of Neuropsychiatry and Clinical Neurosciences*, is protected by copyright and may not be reproduced in any manner without written permission. The *Journal of Neuropsychiatry and Clinical Neurosciences* is abstracted/indexed in *Chemical Abstracts*, *Current Contents/Clinical Medicine*®, *EMBASE/Excerpta Medica*, *Index Medicus/MEDLINE/MEDLARS*, *PsycINFO*, *Psychological Abstracts*, *Research Alert*®, and *Sci Search*®. It is available through University Microfilms, Inc., 300 North Zeeb Road, Ann Arbor, MI 48106, in microform, electronic, or paper format.

Manuscript submissions should no longer be sent by mail. Please visit <http://mc.manuscriptcentral.com> to upload a paper online.

U.S. subscriptions are \$250 per year (4 issues) individual; \$200 for APA members; international subscriptions are \$377 per year; \$302 for international members. APA Members receive 20% discount off regular individual subscription rate. Institutional Subscriptions are tier priced. For institutional site license information and pricing, please email us at [appi@psych.org](mailto:appi@psych.org), call (800) 368-5777 or visit [www.appi.org/ForLibrarians/](http://www.appi.org/ForLibrarians/). The *Journal of Neuropsychiatry and Clinical Neurosciences*, 1000 Wilson Blvd., Suite 1825, Arlington, VA 22209.

Advertising inquiries may be directed to Tim Wolfinger at PMI, 30 East 33rd St., New York, NY 10016; (212) 904-0379; [twolfinger@pminy.com](mailto:twolfinger@pminy.com).

APA is not responsible for statements made in this publication by contributors or advertisers. Unless stated, material in the *Journal of Neuropsychiatry and Clinical Neurosciences* does not reflect the endorsement, official attitude, or position of APA or the American Neuropsychiatric Association.

Periodicals postage paid at Arlington, VA, and additional mailing offices. POSTMASTER: Send address changes to the *Journal of Neuropsychiatry and Clinical Neurosciences*, 1000 Wilson Blvd., Suite 1825, Arlington, VA 22209.

**Editor**  
Stuart C. Yudofsky, M.D.

**Deputy Editors**  
David B. Arciniegas, M.D.  
Robert E. Hales, M.D., M.B.A.

**Assistant to the Editors**  
T. Angelita Garcia, M.B.A.

**Consulting Editors**  
Floyd Bloom, M.D.  
Edward G. Jones, M.D., Ph.D.  
Eric R. Kandel, M.D.  
Henry Nasrallah, M.D.  
Solomon H. Snyder, M.D.

**Associate Editors**  
Nancy C. Andreasen, M.D., Ph.D.  
Nashaat N. Boutros, M.D.  
C. Edward Coffey, M.D.  
Joseph T. Coyle, M.D.  
Jeffrey L. Cummings, M.D.  
Michael Ebert, M.D.  
Dwight L. Evans, M.D.  
Robert C. Green, M.D.  
Edward C. Lauterbach, M.D.  
Thomas W. McAllister, M.D.  
John M. Morihisa, M.D.  
Charles Nemeroff, M.D., Ph.D.  
Thomas C. Neylan, M.D.  
Trevor R. P. Price, M.D.  
Robert G. Robinson, M.D.  
Stephen Salloway, M.D., M.S.  
Randolph B. Schiffer, M.D.  
Jonathan M. Silver, M.D.  
Robert Stern, Ph.D.  
Paula T. Trzepacz, M.D.  
Daniel R. Weinberger, M.D.

**Neuropsychiatric Practice and Opinion Editor**  
Fred Ovsiew, M.D.

**Neuropsychiatry Classics Editor**  
Thomas C. Neylan, M.D.

**Book Review Editor**  
Paula T. Trzepacz, M.D.

**Windows to the Brain Editors**  
Robin A. Hurley, M.D.  
L. Anne Hayman, M.D.  
Katherine H. Taber, Ph.D.

**Research and Statistical Design Consultants**  
Douglas Mossman, M.D.  
Eugene Somoza, M.D., Ph.D.

**American Psychiatric Publishing**  
Rebecca D. Rinehart  
*Publisher*  
Michael Roy  
*Editorial Director, Journals*  
Angela Moore  
*Editorial Manager*  
Wendy Lieberman Taylor  
*Production Manager, Journals*  
Y. Nicole Gray  
*Editorial Support Services Manager*  
Patrick Hansard  
*Director of Marketing and Sales*  
Christopher Keene  
*Sales Manager*  
Roger Domras  
*Director of Fulfillment and Circulation*

Please visit the Journal's website at [neuro.psychiatryonline.org](http://neuro.psychiatryonline.org)

# American Neuropsychiatric Association

The American Neuropsychiatric Association (ANPA), established in 1988, is an organization of professionals in neuropsychiatry, behavioral neurology, neuropsychology and the clinical neurosciences. Our mission is to improve the lives of people with disorders at the interface of psychiatry and neurology.

One strength of our organization is our diverse membership, which is comprised of professionals in all areas of neuroscience who share clinical and/or academic interests in neuropsychiatry. The interdisciplinary makeup of the membership encourages collaboration among educators, clinicians, researchers, students and trainees during research presentations, symposia, workshops, and continuing education courses. *The Journal of Neuropsychiatry and Clinical Neurosciences (JNCN)* is the official publication of the organization, and a subscription is a benefit of membership.

ANPA holds an annual scientific meeting and provides up to 29 CME credits. Members are encouraged to submit their work for presentation at our annual meetings. Travel awards are available for promising trainee clinicians and investigators. Annual meeting abstracts and proceedings are published in *JNCN*.

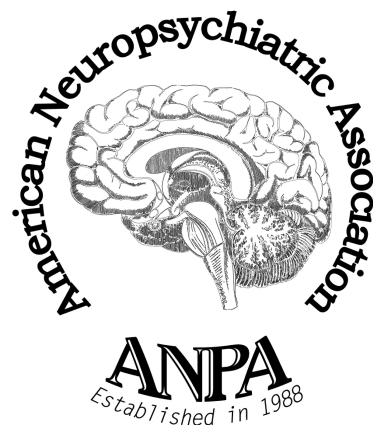

## Contact Information

### Benefits of Membership

- Subscription to *The Journal of Neuropsychiatry and Clinical Neurosciences (JNCN)*
- Discounts on subscriptions to PsychiatryOnline.com including DSM Premium and DSM Premium Plus
- Opportunities for presenting at the annual meeting with accepted abstracts published in the *JNCN*
- Significantly reduced registration fees at the annual meeting
- Newsletters, news updates, information on job and training opportunities, research and meeting information on the ANPA web site: [www.anpaonline.org](http://www.anpaonline.org)
- Discounted membership and meeting registration fees for trainees
- Collaboration in clinical, educational and research activities with opportunities to interact with leaders in the field
- Complimentary video recordings of the annual meetings
- Access to educational slide sets assembled by the Education Committee
- Membership in Special Interest Groups (SIGs) designed to draw together ANPA members with similar clinical, research, and academic interests for the purposes of peer discussion, education, and potential collaboration

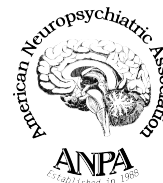

Website:

[www.anpaonline.org](http://www.anpaonline.org)

Email: [anpaoffice@gmail.com](mailto:anpaoffice@gmail.com)

**Join ANPA Now!**

**Don't miss ANPA's  
26<sup>th</sup> Annual Meeting  
March 25-28, 2015  
Lake Buena Vista, Florida**

→ **WALT DISNEY WORLD SWAN AND DOLPHIN**

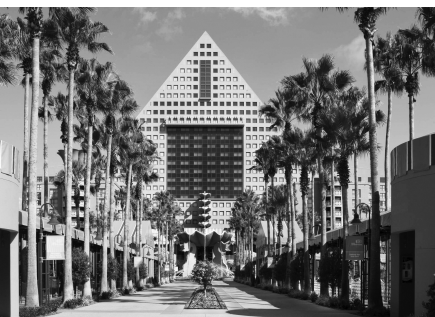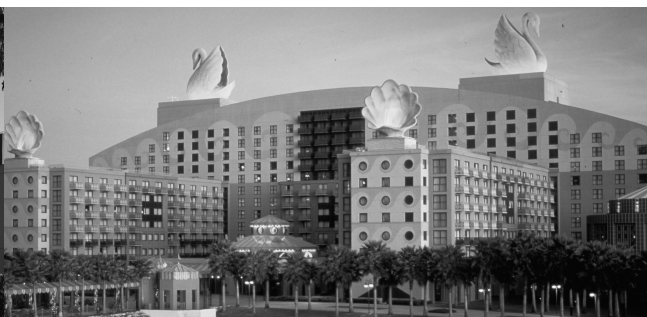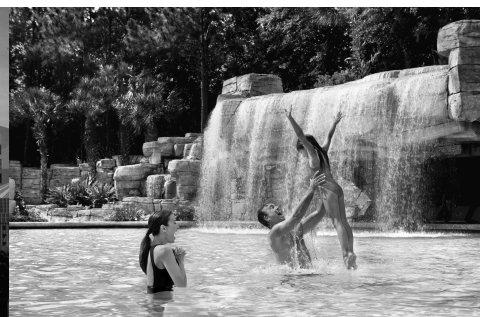

Join online at: [www.anpaonline.org](http://www.anpaonline.org)
